# Supplementary material for: Chrysanthemum Leaf Ethanol Extract Prevents Obesity and Metabolic Disease in Diet-Induced Obese Mice via Lipid Mobilization in White Adipose Tissue
Source: PubMed Central journal article supplement (PMC6628043; doi:10.3390/nu11061347), 2019-06-15
Supplement: nutrients-11-01347-s001.pdf [file nutrients-11-01347-s001.pdf]

## Supplementary Materials

Table S1. Identified flavonoids of chrysanthemum leaf ethanol extract.

| No. | Flavonoids name                   | Content (%) |
|-----|-----------------------------------|-------------|
| 1   | Luteolin                          | 0.008       |
| 2   | Galuteolin                        | 0.004       |
| 3   | Luteolin-7-O-glucuronide          | 0.031       |
| 4   | Luteolin-7-O-6''-acetyl glucoside | 0.002       |
| 5   | Diosmetin-7-O-rutinoside          | 0.0004      |
| 6   | Diosmetin-7-O-glucoside           | 0.005       |
| 7   | Acacetin-7-O-rutinoside           | 0.120       |
| 8   | Apigenin                          | 0.0006      |
| 9   | Chlorogenic acid                  | 0.019       |
| 10  | p-coumaric acid                   | 0.0005      |

Table S2. Diet composition for animal experiment

| Ingredient (g)                 | ND    | HFD   | CLE   | LU    |
|--------------------------------|-------|-------|-------|-------|
| Casein                         | 200   | 200   | 200   | 200   |
| D,L-methionine                 | 3     | 3     | 3     | 3     |
| Cornstarch                     | 150   | 111   | 111   | 111   |
| Sucrose                        | 500   | 370   | 355   | 370   |
| Cellulose                      | 50    | 50    | 50    | 50    |
| Corn Oil                       | 50    | 30    | 30    | 30    |
| Lard                           | -     | 170   | 170   | 170   |
| Mineral Mix <sup>1</sup>       | 35    | 42    | 42    | 42    |
| Vitamin Mix <sup>2</sup>       | 10    | 12    | 12    | 12    |
| Choline bitartrate             | 2     | 2     | 2     | 2     |
| Cholesterol                    | -     | 10    | 10    | 10    |
| TBHQ, antioxidant <sup>3</sup> | 0.01  | 0.04  | 0.04  | 0.04  |
| Bioactive compounds            |       |       | 15    | 0.03  |
| Total (g)                      | 1,000 | 1,000 | 1,000 | 1,000 |

ND, normal diet (AIN-76); HFD, high-fat diet (45% kcal from fat); CLE, HFD+chrysanthemum leaf (1.5%, w/w); LU, HFD+luteolin (0.003% w/w). <sup>1</sup> AIN-76 Mineral Mixture (g/kg): calcium phosphate, 500; sodium chloride, 74; potassium citrate, 2220; potassium sulfate, 52; magnesium oxide, 24; manganous carbonate, 3.5; ferric citrate, 6; zinc carbonate, 1.6; cupric carbonate, 0.3; potassium iodate, 0.01; sodium celenite, 0.01; chromium potassium sulfate, 0.55; sucrose 118.03 <sup>2</sup>AIN-76 Vitamin Mixture (g/kg): thiamin HCl, 0.6; riboflavin, 0.6; pyridoxine HCl, 0.7; nicotinic acid, 0.003; D-calcium pantothenate, 0.0016; folate, 0.2; D-biotin, 0.02; cyanocobalamin (vitamin B12), 0.001; retinyl palmitate premix, 0.8; DL-alpha tocopherly acetate, premix, 20; cholecalciferol (vitamin D3), 0.0025; menaquinone (vitamin K), 0.05; antioxidant, 0.01; sucrose, finely powdered, 972.8.

**Table S3.** Classification of functional annotation clusters among up-regulated genes from chrysanthemum leaf ethanol extract and luteolin-responsive genes in epididymal white adipose tissue of C57BL/6J mice fed a high-fat diet.

| Group      | Term                                             | genes                                                                                                                                                                                                                                                                                                                                                                                                                                                                                                                                                                                                                                                                                                                                                                                                                                                                                                                                                                                                                                                                                                                                                                                                                                                                                                                                                                                                                                                                                                                                                                                                                                                                 | Count | ES   | <i>p</i> -value |
|------------|--------------------------------------------------|-----------------------------------------------------------------------------------------------------------------------------------------------------------------------------------------------------------------------------------------------------------------------------------------------------------------------------------------------------------------------------------------------------------------------------------------------------------------------------------------------------------------------------------------------------------------------------------------------------------------------------------------------------------------------------------------------------------------------------------------------------------------------------------------------------------------------------------------------------------------------------------------------------------------------------------------------------------------------------------------------------------------------------------------------------------------------------------------------------------------------------------------------------------------------------------------------------------------------------------------------------------------------------------------------------------------------------------------------------------------------------------------------------------------------------------------------------------------------------------------------------------------------------------------------------------------------------------------------------------------------------------------------------------------------|-------|------|-----------------|
| CLE vs HFD | Glycoprotein                                     | Nt5e, Art3, Abca5, Abcb1a, Abcc9, Abcg2, Clec14a, Clec2d, Cd164l2, Cd19, Cd1d1, Cd209b, Cd300lg, Cd38, Cd46, Dcst1, Eogt, Ephb4, F11r, Flt1, Flt4, Fcaml, Gpr156, Gpr160, Gpr17, Gpr182, Gpr, Mamdc4, Rbm, Smoc1, St6galnac2, St6galnac5, B3galnt2, Galnt15, Galnt18, Acr, Acvr1b, Apcdd1, Adora2a, Adcy4, Adcy5, Amigo2, Adipoq, Adrb1, Adrb2, Adrb3, Acer2, Agr1a, Agt, Apoe, Bcam, Btc, Bmp4, Bmp6, Bdkrb2, Btl9, Bche, Cdh13, Calca, Cacna2d1, keratan sulfate Gal-6, Chst1, Car4, Ces1d, Catsperg1, Cp, Cmklr1, Chrb1, Chrd1, F2r1, Cfd, Cnm3, Dll1, Disp2, Enpp2, Enpp4, Eng, Emcn, Ednrb, Etl4, Efn1, Efnb1, Egf, Emp1, Erbb2, Eva1c, AU021092, Fam20a, Fgf10, Fgfr3, Flrt3, Fbln5, Ffar4, Fzd6, Gabbr1, Gabrr2, Gpr, Gfra4, Gcgr, Gcnt2, Grik5, Gde1, Gpm6a, Glycam1, Grem2, Hfe2, Hs3st3b1, Hrh2, Hsd11b1, Hcn4, Ier3, Insr, Itgb4, Itih4, Icam2, Ii15ra, Il2ra, Jag2, Jam2, Jup, Kirrel3, Kdr, Klb, Lamc3, Lama3, Lrrn4, Lgi1, Lect1, Lipg, Lrp5, Ly6c1, Lpar6, Mst1r, Mmp15, Mmp9, Mc5r, Mogat1, Mmrn2, Npr2, Nrg4, Negr1, Nog, Nup210, Olfm2, Pnpla2, Ptch2, Pla2g2d, Plvap, Pdgfd, Podxl, Podn, Pkd2l2, Kcnt1, Kcnc3, Kcne1, Kcne4, Pcsk5, Ptger3, Ptgfr, Prss55, Ptprb, Ptprm, Ptpr, Ptpru, Robo4, Sgce, Sctr, Sema3f, Sema3g, Sema4c, Sema6a, Serpina1a, Serpina1c, Serpine1, Sdk2, Sigirr, Slit3, Slc1a3, Slc12a2, Slc12a5, Slc19a3, Slc2a3, Slc22a3, Slc4a4, Slc4a11, Slc44a3, Slc52a3, Spock2, S1pr4, Stc2, Sucnr1, Susd4, Synpo, Tex2, Tspan2, Tspan7, Tspan9, Thbs1, Thbs2, Thsd1, Tslp, Akt2, Tfrc, Tgfbr3, Tm4sf1, Tmc7, Tmprss5, Tmem120a, Tmem17, Tmem204, Tmem8b, Ttr, Tinagl1, Tnfsf10, Tie1, Unc5b, Upk1b, Upk3b, Vnn1, Vnn3, Vegfa, Wnt11 | 224   | 3.67 | 1.30E-10        |
|            | Insulin signaling pathway                        | Mknk2, Acaca, Acach, Eif4ebp1, Irs1, Irs2, Insr, Pygl, Pygm, Pde3b, Pck1, Prkag3, Ppp1r3c, Rps6, Akt2                                                                                                                                                                                                                                                                                                                                                                                                                                                                                                                                                                                                                                                                                                                                                                                                                                                                                                                                                                                                                                                                                                                                                                                                                                                                                                                                                                                                                                                                                                                                                                 | 15    | 2.28 | 3.40E-03        |
|            | Diet induced thermogenesis                       | Adrb1, Adrb2, Adrb3, Clic5, Trpv4                                                                                                                                                                                                                                                                                                                                                                                                                                                                                                                                                                                                                                                                                                                                                                                                                                                                                                                                                                                                                                                                                                                                                                                                                                                                                                                                                                                                                                                                                                                                                                                                                                     | 5     | 1.71 | 1.70E-03        |
|            | Positive regulation of glucose import            | Adipor2, Adipoq, Irs1, Irs2, Insr, Akt2                                                                                                                                                                                                                                                                                                                                                                                                                                                                                                                                                                                                                                                                                                                                                                                                                                                                                                                                                                                                                                                                                                                                                                                                                                                                                                                                                                                                                                                                                                                                                                                                                               | 6     | 1.53 | 1.20E-02        |
|            | Positive regulation of fatty acid beta-oxidation | Fabp1, Irs1, Irs2, Akt2                                                                                                                                                                                                                                                                                                                                                                                                                                                                                                                                                                                                                                                                                                                                                                                                                                                                                                                                                                                                                                                                                                                                                                                                                                                                                                                                                                                                                                                                                                                                                                                                                                               | 4     | 1.53 | 5.40E-03        |
| LU vs HFD  | Glycoprotein                                     | Nt5e, Art3, Abca5, Abcb1a, Abcc9, Clec14a, Clec2d, Cd19, Cd209a, Cd209b, Cd209d, Cd300lg, Cd38, Cd46, Emid1, Ephb4, F11r, Gpr156, Gpr160, Gpr182, Gpr4, Gprc5a, Gpihbp1, Kiss1r, Mamdc4, Smoc1, St6galnac2, B3galnt2, Galnt18, Vsig2, Apcdd1, Adora2a, Adcy4, Amigo2, Adrb1, Adrb2, Adrb3, Acer2, Agr1a, Agt, Bcam, B4galnt2, Btc, Bmp4, Bmp6, Bdkrb2, Btl9, Bche, Cdh13, Cdh5, Cdh5, Cacna2d3, Car4, Ces1d, Catsperg1, Ccl28, Cxcl9, Chrd1, Cfd, Crisp1, Disp2, Enpp4, Eng, Emcn, Ednrb, Etl4, Efn1, Efnb1, Epcam, Eva1c, Fam20a, Fgf10, Fgfr3, Fbln5, Ffar4, Fzd6, Glb1, Gabbr1, Gabrr2, Gpr, Gfra1, Gcgr, Gcnt2, Grik5, Gde1, Gpm6a, Grem2, Hs3st3b1, Hs3st6, Hrh2, Hsd11b1, Hcn4, Ier3, Igfbp2, Itgb4, Icam2, Ii15ra, Il2ra, Jag2, Jup, Krt18, Krt8, Kirrel3, Kd, Lamc3, Lama3, Lrrn4, Lrig3, Lipg, Lrp2, Ly6a, Ly6c1, Ltb, Lpar6, Mst1r, Mmp15, Mmp9, Mogat1, Mmrn2, Npr2, Nrg4, Negr1, Nog, Nup210, Olfm2, Ptch2, Pgf, Plvap, Podxl, Pkhd11l1, Pkd2l2, Kcnt1, Kcne1, Kcne4, Prom1, Ptger3, Prss55, Ptprb, Ptpr, Ptpru, Robo4, Sctr, Sema3f, Sema3g, Sema6a, Serpina1c, Serpina3b, Serpine1, Spint2, Sdk2, Slc1a3, Slc12a2, Slc19a3, Slc2a3, Slc22a3, Slc4a4, Slc4a11, Slc44a3, Slc52a3, Spock2, S1pr1, S1pr4, Susd4, Synpo, Tspan2, Tspan7,                                                                                                                                                                                                                                                                                                                                                                                                                     | 181   | 5.05 | 7.50E-14        |

|                                   | Thbs1, Tm4sf1, Tmprss5, Tmem204, Tinagl1, Tnfsf10, Tie1, Upk1b, Upk3b, Vnn1, Vegfa, Wnt10b, Wnt11, Wnt2b, Wnt9a) |   |      |          |
|-----------------------------------|------------------------------------------------------------------------------------------------------------------|---|------|----------|
| Glutathione metabolic process     | Gsta3, Gsta4, Gstm5, Gstt1, Gstt2, Gpx3, Mgst1                                                                   | 7 | 2.07 | 3.10E-03 |
| Diet induced thermogenesis        | Adrb1, Adrb2, Adrb3, Clic5                                                                                       | 4 | 1.84 | 5.90E-03 |
| Cellular response to BMP stimulus | Gata6, Bmp4, Bmp6, Heyl, Nog, Spint2                                                                             | 6 | 1.71 | 3.50E-03 |

Differentially expressed genes based on CLE and LU vs HFD comparison according to q-value < 0.05, fold change > 1.5. Functional gene ontology terms enriched among chrysanthemum leaf ethanol extract-responsive genes are clustered according to biological processes (enrichment score>1.5) using DAVID. Term: A detailed item in an annotation source.

**Table S4.** Primer sequences for genes used for real-time PCR.

| Primer   | Sequence                                                                                                                |
|----------|-------------------------------------------------------------------------------------------------------------------------|
| Ppara    | 5'-CCT GAA CAT CGA GTG TCG AAT AT -3' (forward)<br>5'-GGT GGG CCA GAA TGG CAT CT-3' (reverse)                           |
| Pparg    | 5'-GAG TGT GAC GAC AAG ATT TG-3' (forward)<br>5'-GGT GGG CCA GAA TGG CAT CT-3' (reverse)                                |
| Ppargc1a | 5'-AAG TGT GGA ACT CTC TGG AAC TG-3' (forward)<br>5'-GGG TTA TCT TGG TTG GCT TTA TG-3' (reverse)                        |
| Ppargc1b | 5'-GGT TCC TGG CTG ACA TTC AC-3' (forward)<br>5'-GGC ACA TCG AGG GCA GAG-3' (reverse)                                   |
| Srebf1a  | 5'-TAG TCC GAA GCC GGG TGG GCG CCG GCG CCA T-3' (forward)<br>5'-GAT GTC GTT CAA AAC CGC TGT GTG TCC AGT TC-3' (reverse) |
| Srebf1c  | 5'-GGA GCC ATG GAT TGC ACA TT-3' (forward)<br>5'-CCT GTC TCA CCC CCA GCA TA-3' (reverse)                                |
| Srebf2   | 5'-CAC AAT ATC ATT GAA AAG CGC TAC CGG TCC-3' (forward)<br>5'-TTT TTC TGA TTG GCC AGC TTC AGC ACC ATG-3' (reverse)      |
| Cpt1a    | 5'-ATC TGG ATG GCT ATG GTC AAG GTC-3' (forward)<br>5'-GTG CTG TCA TGC GTT GGA AGT C-3' (reverse)                        |
| Cpt2     | 5'-GCC TGC TGT TGC GTG ACT G-3' (forward)<br>5'-TGG TGG GTA CGA TGC TGT GC-3' (reverse)                                 |
| Scd1     | 5'-CCC CTG CGG ATC TTC CTT AT-3' (forward)<br>5'-AGG GTC GGC GTG TGT TTC T-3' (reverse)                                 |
| Fasn     | 5'-GCT GCG GAA ACT TCA GGA AAT-3' (forward)<br>5'-AGAGAC GTG TCA CTC CTG GAC TT-3' (reverse)                            |
| Acaca1   | 5'-GCC TCT TCC TGA CAA ACG AG-3' (forward)<br>5'-TGA CTG CCG AAA CAT CTC TG-3' (reverse)                                |
| Sirt1    | 5'-TGT GAA GTT ACT GCA GGA GTG TAA A-3' (forward)<br>5'-GCA TAG ATA CCG TCT CTT GAT CTG AA-3' (reverse)                 |
| Ucp1     | 5'-AGA TCT TCT CAG CCG GAG TTT-3' (forward)<br>5'-CTG TAC AGT TTC GGC AAT CCT-3' (reverse)                              |
| Cox8b    | 5'-TGT GGG GAT CTC AGC CAT AGT-3' (forward)<br>5'-AGT GGG CTA AGA CCC ATC CTG-3' (reverse)                              |
| Cidea    | 5'-TTT CAA ACC ATG ACC GAA GTA GCC-3' (forward)<br>5'-CCT CCA GCA CCA GCG TAA CC-3' (reverse)                           |
| Adrb3    | 5'- ACC AAC GTG TTC GTG ACT-3' (forward)<br>5'- ACA GCT AGG TAG CCG TCC-3' (reverse)                                    |
| Fgf21    | 5'- ATG GAA TGG ATG AGA TCT AGA GTT GG-3' (forward)<br>5'- TCT TGG TGG TCA TCT GTG TAG AGG-3' (reverse)                 |
| Acox1    | 5'- CCC AAC TGT GAC TTC CAT T-3' (forward)<br>5'- GGC ATG TAA CCC GTA GCA CT-3'(reverse)                                |
| Acadm    | 5'-CAA GTT CAA CGG CAC AGT CAA GG-3' (forward)<br>5'-ACA TAC TCA GCA CCA GCA TCA CC-3' (reverse)                        |
| Acadl    | 5'-TCA CCA ACC GTG AAG CTC GA-3' (forward)<br>5'-CCA AAA AGA GGC TAA TGC CAT G-3' (reverse)                             |
| Adipoq   | 5'-GCA CTG GCA AGT TCT ACT GCA A (forward)<br>5'-GTA GGT GAA GAG AAC GGC CTT GT (reverse)                               |
| Tnfa     | 5'-AAA GAC ACC ATG AGC ACA GAA AGC-3' (forward)<br>5'-GCC ACA AGC AGG AAT GAG AAG AG-3' (reverse)                       |
| Tlr2     | 5'-GAG CAT CCG AAT TGC ATC AC-3' (forward)                                                                              |

|      |                                             |
|------|---------------------------------------------|
|      | 5'-TAT GGC CAC CAA GAT CCA GA-3' (reverse)  |
| Tlr4 | 5'-AAG AGC CGG AAG GTT ATT GTG-3' (forward) |
|      | 5'-CCC ATT CCA GGT AGG TGT TTC-3' (reverse) |
| 36B4 | 5'-CAG ATT GGC TAC CCA ACT GTT-3' (forward) |
|      | 5'-GGG AAG GTG TAA TCC GTC TCC-3' (reverse) |
